# Supplementary material for: Disruption of mstn Gene by CRISPR/Cas9 in Large Yellow Croaker (Larimichthys crocea)
Source: Research Square preprint supplement (doi:10.21203/rs.3.rs-1524321/v1), 2022-04-14
Supplement: Supplementary file 1 [file 9d7d67f1b65b7a7c12cbaa3f.docx]

**Supplementary Table S2.** The accession numbers of MSTN/Mstn protein sequences for phylogenetic analysis.

| Species | Protein name | Uniprot ID |
| --- | --- | --- |
| Human (*Homo sapiens*) | MSTN | O14793 |
| Mouse (*Mus musculus*) | MSTN | O08689 |
| Chicken (*Gallus gallus*) | MSTN | Q06BS3 |
| Wall lizard (*Podarcis muralis*) | MSTN | A0A670HYB9 |
| Zebrafish (*Danio rerio*) | MSTNa | Q68IN2 |
| Zebrafish (*Danio rerio*) | MSTNb | O42222 |
| Channel catfish (*Ictalurus punctatus*) | MSTNa | A0A6C0W6S6 |
| Channel catfish (*Ictalurus punctatus*) | MSTNb | Q90YY0 |
